# Supplementary material for: Arginase 1 is a key driver of immune suppression in pancreatic cancer
Source: eLife journal article supplement (doi:10.7554/elife.80721), 2023-02-02
Supplement: fig2-data1 [file Note regarding Figure 2-source data 1.docx]

Note regarding Figure 2-source data 1

Here are two full size gels of the same western blot. One is at a higher exposure than the other to easily identify the edges of the full gel. We had originally labeled the gels for easy identification of the bands at a later time.
