# Supplementary material for: Arginase 1 is a key driver of immune suppression in pancreatic cancer
Source: eLife. 2023 Feb 2;12:e80721. doi: 10.7554/eLife.80721 (PMC10260021; doi:10.7554/eLife.80721)
Supplement: Figure 2—figure supplement 2—source data 1. [file elife-80721-fig2-figsupp2-data1.xlsx]

## Sheet: Sheet1
	Single cell population levels:				Percentage of each cell type:
		KF	KFCA			KF	KFCA
	Epithelial	5	25		Epithelial	0.00173671	0.00496919
	Acinar	200	258		Acinar	0.0694686	0.0512821
	Mesothelial	99	85		Mesothelial	0.0343869	0.0168952
	Fibroblasts	1664	2378		Fibroblasts	0.577978	0.472669
	Endothelial	59	140		Endothelial	0.0204932	0.0278275
	Macrophage	185	305		Macrophage	0.0642584	0.0606241
	MDSC	36	63		MDSC	0.0125043	0.0125224
	Dendritic Cell	41	111		Dendritic Cell	0.0142411	0.0220632
	CD4+ T cells	223	482		CD4+ T cells	0.0774575	0.095806
	CD8+ T cells	68	332		CD8+ T cells	0.0236193	0.0659909
	Tregs	81	204		Tregs	0.0281348	0.0405486
	gd T cells	17	87		gd T cells	0.00590483	0.0172928
	NK T Cells	35	170		NK T Cells	0.012157	0.0337905
	NK Cells	46	44		NK Cells	0.0159778	0.00874578
	B Cells	26	147		B Cells	0.00903091	0.0292188
	Plasma Cells	20	103		Plasma Cells	0.00694686	0.0204731
	Mast Cells	40	19		Mast Cells	0.0138937	0.00377659
	Proliferating Cells	34	78		Proliferating Cells	0.0118097	0.0155039
	TOTAL	2879	5031
