# Supplementary material for: Arginase 1 is a key driver of immune suppression in pancreatic cancer
Source: eLife. 2023 Feb 2;12:e80721. doi: 10.7554/eLife.80721 (PMC10260021; doi:10.7554/eLife.80721)
Supplement: Figure 3—source data 1. [file elife-80721-fig3-data1.xlsx]

## Sheet: Sheet1
	Single cell population levels:				Percentage of total lymphocytes:
	Cell Type	KF	KFCA			KF	KFCA
	Naive CD8+ T Cell	20	84		Naive CD8+ T Cell	0.0560224	0.0705882
	Cytotoxic CD8+ T Cell	5	67		Cytotoxic CD8+ T Cell	0.0140056	0.0563025
	Exhausted CD8+ T Cell	41	267		Exhausted CD8+ T Cell	0.114846	0.22437
	CD4 T Helper	123	262		CD4 T Helper	0.344538	0.220168
	Treg	99	320		Treg	0.277311	0.268908
	gd T Cell	35	113		gd T Cell	0.0980392	0.094958
	NKT Cell	33	32		NKT Cell	0.092437	0.0268908
	NK Cell	1	45		NK Cell	0.00280112	0.0378151
	Total lymphocytes	357	1190
