# Supplementary figures and images for: Arginase 1 is a key driver of immune suppression in pancreatic cancer
Source: eLife journal article supplement (doi:10.7554/elife.80721), 2023-02-02

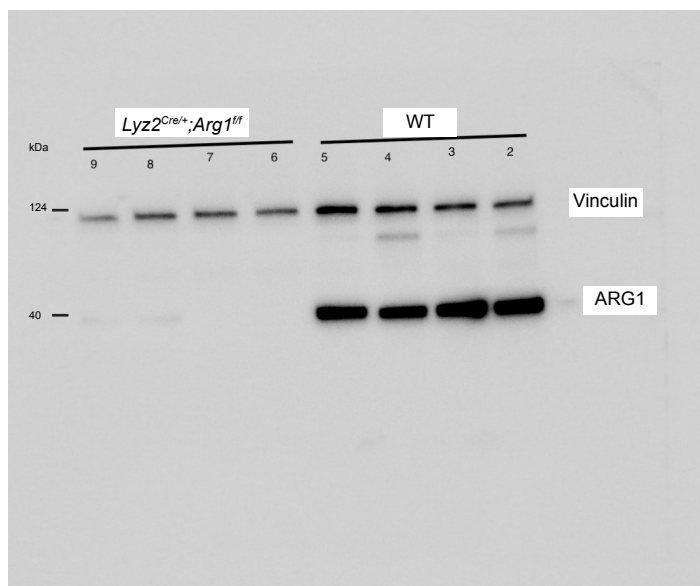

Supplement: fig2-data1 [file Fig2-sourceData1a.pdf › Fig2-source data/Fig2-sourceData1a.pdf]

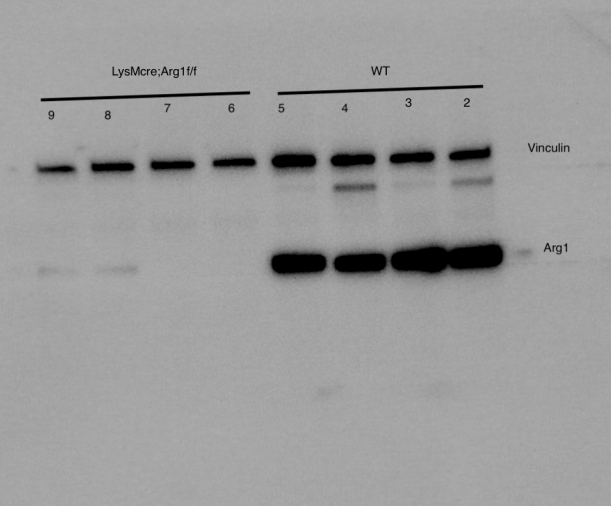

Supplement: fig2-data1 [file Fig2-sourceData1b.pdf › Fig2-source data/Fig2-sourceData1b.pdf]
